# Supplementary material for: Cranial thoracic myelopathies (T1-T6 vertebrae): Retrospective evaluation of the signalment, clinical presentation, and, presumptive or final diagnoses in 84 dogs
Source: Front Vet Sci. 2022 Sep 12;9:960912. doi: 10.3389/fvets.2022.960912 (PMC9510707; doi:10.3389/fvets.2022.960912)
Supplement: Supplementary file 1 [file Table_1.XLSX]

## Sheet: Sheet1
Table Sp1: Summary of the cases included in the study. Duration in weeks. CTMR: cutaneous trunci muscle reflex. TL: thoracic limb. FN: Female neutered. FE: Female entire. MN: male neutered. ME: male entire. N/A: Not applicable. *this case was receiving chronic oral estriol.
#	Breed	Signalment	Age at diagnosis (m)	Onset	Progression	Duration	Ambulatory	Ataxia	CTMR cut-off	Asymmetric signs	Worse Side	Urinary/faecal incontinence	SSTLG Short strided thoracic limb gait	Spinal pain	Neurolocasitation	Lesion characteristics	Location	Disease category (VITAMIN D)
1	Rhodesian Ridgeback	FN	115	Chronic	Progressive	over 4	Yes	Yes	Present	Yes	Right	No	No	No	T3-L3	Extradural	T4-T7	Anomalous
2	Staffordshire Bull Terrier	FN	88	Chronic	Progressive	over 4	Yes	Yes	Present	No	NA	No	No	Yes	T3-L3	Intramedullary	C6-T3	Inflammatory
3	Schnauzer	MN	120	Chronic	Progressive	2 to 4	Yes	Yes	Present	Yes	Left	No	No	No	T3-L3	Intradural-extramedullary	T2-T4	Neoplasia
4	Springer Spaniel	ME	79	Acute	Progressive	less 2	Yes	No	Present	No	NA	No	No	Yes	Spinal hyperaesthesia	Extradural	T5-T6	Infectious
5	West Highland White Terrier	MN	136	Chronic	Progressive	2 to 4	Yes	Yes	Present	Yes	Left	No	No	No	T3-L3	Intramedullary	T4-T6	Inflammatory
6	Pug	MN	10	Chronic	Progressive	over 4	Yes	Yes	Present	No	NA	No	No	No	T3-L3	Extradural	T5-T8	Anomalous
7	Lurcher	MN	139	Chronic	Progressive	over 4	Yes	Yes	Present	No	NA	No	No	Yes	T3-L3	Intramedullary	T1-T5	Neoplasia
8	Italian Greyhound	MN	124	Acute	Non-progressive	2 to 4	Yes	Yes	Present	Yes	Left	No	No	Yes	T3-L3	Intramedullary	T2-T5	Inflammatory
9	Crossbreed	MN	190	Chronic	Progressive	over 4	Yes	No	Present	Yes	Right	No	No	Yes	Spinal hyperaesthesia	Extradural	T1	Neoplasia
10	Dogue de Bordeaux	ME	64	Chronic	Progressive	over 4	No	No	Present	No	NA	No	No	No	T3-L3	Extradural	T2-T8	Anomalous
11	West Highland White Terrier	MN	205	Acute	Progressive	over 4	No	No	Present	Yes	Right	No	No	Yes	T3-L3	Extradural	T1-T4	Neoplasia
12	French Bulldog	MN	16	Acute	Non-progressive	less 2	Yes	Yes	L4	No	NA	No	No	Yes	T3-L3	Extradural	T2-T3	Anomalous
13	Tibetan Terrier	MN	115	Acute	Progressive	over 4	Yes	Yes	Present	No	NA	No	No	Yes	T3-L3	Extradural	T2	Neoplasia
14	Dachshund	MN	9	Acute	Progressive	less 2	Yes	No	Present	No	NA	No	No	Yes	Spinal hyperaesthesia	Intramedullary	T3-T5	Inflammatory
15	Boxer	FN	121	Chronic	Progressive	less 2	Yes	No	Present	No	NA	No	No	Yes	Spinal hyperaesthesia	Extradural	T3 and T6	Neoplasia
16	Labrador Retriever	FE	4	Chronic	Progressive	2 to 4	Yes	Yes	Absent	No	NA	No	No	No	T3-L3	Extradural	T1-T5	Anomalous
17	Crossbreed	MN	66	Chronic	Progressive	2 to 4	Yes	Yes	Present	No	NA	No	No	Yes	T3-L3	Extradural	T1-T3	Neoplasia
18	Border Collie	MN	132	Chronic	Progressive	2 to 4	No	No	Present	Yes	Right	No	No	No	T3-L3	Extradural	T1-T3	Neoplasia
19	Springer Spaniel	MN	117	Chronic	Progressive	over 4	Yes	Yes	Present	Yes	Right	No	No	No	T3-L3	Extradural	T4-T5	Degenerative
20	Irish wolfhound	ME	9	Acute	Progressive	over 4	Yes	No	Present	No	NA	No	No	Yes	Spinal hyperaesthesia	Extradural	T3-T4	Infectious
21	Gordon Setter	FN	122	Chronic	Progressive	2 to 4	Yes	Yes	Absent	Yes	Right	No	No	Yes	T3-L3	Extradural	T5-T6	Neoplasia
22	Springer Spaniel	MN	87	Acute	Progressive	over 4	No	No	Present	Yes	Left	No	No	Yes	C6-T2	Extradural	T1	Neoplasia
23	Great Dane	MN	125	Acute	Progressive	over 4	Yes	Yes	Present	Yes	Right	No	No	Yes	C6-T2	Extradural	T1-T2	Degenerative
24	Labrador Retriever	ME	107	Acute	Progressive	less 2	No	No	Mid-thoracic	Yes	Left	No	No	Yes	T3-L3	Intradural-extramedullary	T6-T7	Neoplasia
25	English Bull Terrier	MN	148	Acute	Progressive	less 2	Yes	Yes	Present	No	NA	No	No	Yes	T3-L3	Extradural	T5-T6	Infectious
26	Staffordshire Bull Terrier	MN	153	Chronic	Progressive	over 4	Yes	Yes	Present	Yes	Right	No	Yes	No	T3-L3	Extradural	T5-T6	Neoplasia
27	Pug	ME	36	Acute	Progressive improvement	2 to 4	Yes	Yes	Caudal thoracic	No	NA	No	No	No	T3-L3	Extradural	T4-T9	Anomalous
28	French Bulldog	FN	74	Chronic	Progressive	over 4	Yes	Yes	Present	No	NA	No	No	No	T3-L3	Extradural	T6	Anomalous
29	German Shepherd dog	FN	119	Chronic	Progressive	2 to 4	Yes	Yes	Present	No	NA	No	No	Yes	Spinal hyperaesthesia	Extradural	T5-T6	Infectious
30	Labrador Retriever	FN	84	Chronic	Progressive	2 to 4	Yes	No	Present	Yes	Right	No	No	Yes	C6-T2	Extradural	T3	Neoplasia
31	Golden Retriever	FN	68	Acute	Progressive	less 2	No	No	T6	No	NA	No	No	No	T3-L3	Extradural	T4	Neoplasia
32	English Bulldog	MN	6	Chronic	Progressive	over 4	Yes	Yes	Present	Yes	Left	No	No	No	T3-L3	Extradural	T2-T7	Anomalous
33	French Bulldog	ME	7	Chronic	Progressive	over 4	Yes	Yes	Present	No	NA	No	No	Yes	T3-L3	Extradural	T5-T7	Anomalous
34	German Shepherd dog	FE	72	Chronic	Progressive	2 to 4	Yes	Yes	Present	Yes	Right	No	Yes	No	T3-L3	Extradural	T2-T3	Degenerative
35	Labrador Retriever	MN	170	Acute	Progressive	over 4	Yes	Yes	L2	Yes	Right	No	No	No	T3-L3	Extradural	T3-T4	Degenerative
36	French Bulldog	ME	5	Chronic	Progressive	2 to 4	Yes	Yes	Present	Yes	Left	No	No	No	T3-L3	Extradural	T5-T8	Anomalous
37	Golden Retriever	MN	108	Acute	Progressive	less 2	No	No	Present	Yes	Left	No	Yes	No	T3-L3	Extradural	T3	Neoplasia
38	West Highland White Terrier	FN	116	Acute	Progressive	2 to 4	No	No	Absent	No	NA	No	Yes	No	T3-L3	Extradural	T1 and T6	Neoplasia
39	Labradoodle	MN	48	Acute	Progressive	less 2	Yes	Yes	Present	Yes	Right	No	Yes	Yes	T3-L3	Intramedullary	T1-T5	Inflammatory
40	German Shepherd dog	MN	139	Chronic	Progressive	over 4	No	No	Present	Yes	Right	No	No	No	T3-L3	Extradural	T3-T4	Degenerative
41	English Bulldog	MN	60	Acute	Progressive	less 2	No	No	Mid-lumbar	No	NA	No	No	Yes	T3-L3	Extradural	T4-T5	Neoplasia
42	Crossbreed	MN	15	Chronic	Progressive	over 4	Yes	No	Present	No	NA	No	No	Yes	Spinal hyperaesthesia	Extradural	T3-T4	Infectious
43	Boxer	FN	132	Chronic	Progressive	over 4	Yes	No	Present	No	NA	No	No	Yes	Spinal hyperaesthesia	Extradural	T1 and T6	Neoplasia
44	Staffordshire Bull Terrier	FN	124	Chronic	Progressive	2 to 4	No	No	Absent	No	NA	No	No	Yes	T3-L3	Extradural	T3	Neoplasia
45	Springer Spaniel	FN	147	Acute	Progressive	less 2	Yes	No	Present	No	NA	No	No	Yes	Spinal hyperaesthesia	Extradural	T3-T4	Neoplasia
46	German Shepherd dog	ME	113	Chronic	Progressive	over 4	Yes	Yes	Absent	Yes	Left	No	No	No	T3-L3	Extradural	T4-T5	Degenerative
47	Golden Retriever	FN	134	Acute	Progressive	2 to 4	No	No	T8	Yes	Left	No	No	Yes	T3-L3	Extradural	T1-T3 and T4-T5	Neoplasia
48	Miniature Schnauzer	FN	127	Chronic	Progressive	over 4	Yes	Yes	L4	Yes	Left	Yes	Yes	No	T3-L3	Intradural-extramedullary	T1	Neoplasia
49	Staffordshire Bull Terrier	MN	139	Acute	Progressive	2 to 4	No	No	T12	No	NA	No	Yes	Yes	T3-L3	Extradural	T5-T6	Neoplasia
50	Rottweiler	ME	4	Acute	Non-progressive	less 2	Yes	Yes	Present	No	NA	No	No	Yes	T3-L3	Extradural	T1-T2	Anomalous
51	Crossbreed	ME	123	Acute	Progressive	over 4	Yes	Yes	Present	Yes	Left	No	No	No	T3-L3	Extradural	T2-T3	Degenerative
52	English Bulldog	FN	67	Acute	Progressive	2 to 4	Yes	Yes	Present	No	NA	No	No	No	T3-L3	Extradural	T5-T6	Degenerative
53	English Bulldog	ME	52	Acute	Progressive	less 2	Yes	Yes	Present	Yes	Left	No	No	No	T3-L3	Extradural	T5	Degenerative
54	Rottweiler	ME	5	Acute	Progressive	over 4	Yes	Yes	Present	No	NA	No	No	No	T3-L3	Extradural	T2-T3	Anomalous
55	French Bulldog	FE	68	Chronic	Progressive	over 4	Yes	Yes	Present	Yes	Right	No	No	No	T3-L3	Extradural	T5-T8	Anomalous
56	Chihuahua	FN	26	Acute	Progressive	less 2	Yes	No	Present	No	NA	No	No	Yes	Spinal hyperaesthesia	Intramedullary	T4-T5	Inflammatory
57	West highland white terrier	MN	57	Acute	Progressive	2 to 4	No	No	Absent	Yes	Left	No	No	Yes	T3-L3	Extradural	T3-T4	Neoplasia
58	Pug	MN	63	Chronic	Progressive	over 4	Yes	Yes	Present	Yes	Left	No	No	No	T3-L3	Extradural	T5-T7	Degenerative
59	Collie	FN	144	Acute	Progressive	less 2	Yes	Yes	Present	No	NA	No	Yes	No	C6-T2	Extradural	T3-T4	Neoplasia
60	Cairn terrier	MN	135	Chronic	Progressive	over 4	Yes	Yes	Absent	Yes	Right	No	No	Yes	C6-T2	Extradural	T3-T6	Neoplasia
61	English Bulldog	MN	60	Chronic	Progressive	over 4	Yes	Yes	Absent	Yes	Right	No	No	Yes	C6-T2	Extradural	T6	Degenerative
62	Clumber spaniel	MN	91	Acute	Progressive	over 4	No	No	Present	Yes	Left	No	No	Yes	T3-L3	Extradural	T4-T5	Degenerative
63	German shepherd dog	ME	101	Chronic	Non-progressive	over 4	Yes	Yes	Present	Yes	Left	No	No	No	T3-L3	Extradural	T2-T3	Degenerative
64	French Bulldog	FE	14	Chronic	Non-progressive	over 4	Yes	Yes	T12	Yes	Right	No	No	No	T3-L3	Extradural	T5-T7	Degenerative
65	English Bull Terrier	FE	4	Acute	Progressive	2 to 4	Yes	Yes	Present	Yes	Right	No	No	No	T3-L3	Extradural	T4	Anomalous
66	Dogue de Bordeaux	ME	6	Acute	Non-progressive	over 4	Yes	Yes	Present	No	NA	No	No	Yes	C6-T2	Extradural	T3-T6	Anomalous
67	German Shepherd dog	ME	10	Chronic	Progressive	over 4	Yes	Yes	Present	No	NA	No	No	No	T3-L3	Extradural	T2-T3	Anomalous
68	Golden Retriever	ME	2	Chronic	Non-progressive	over 4	Yes	No	Present	Yes	Left	No	No	No	C6-T2	Extradural	T4	Anomalous
69	Crossbreed	MN	108	Chronic	Progressive	over 4	Yes	Yes	Present	No	NA	Yes	No	Yes	T3-L3	Intradural-extramedullary	T5-T7	Neoplasia
70	Staffordshire Bull Terrier	MN	130	Acute	Progressive	less 2	Yes	Yes	Present	Yes	Right	No	No	Yes	T3-L3	Extradural	T6	Neoplasia
71	French Bulldog	FE	7	Acute	Progressive	less 2	Yes	Yes	Inconsistent	No	NA	No	No	Yes	T3-L3	Intramedullary	T4-T6	Inflammatory
72	Labrador Retriever	FN	96	Chronic	Progressive	less 2	Yes	Yes	Present	No	NA	No	Yes	Yes	C6-T2	Extradural	T1-T4	Neoplasia
73	Golden Retriever	FN	108	Acute	Progressive	less 2	No	No	Present	No	NA	No	No	No	T3-L3	Extradural	T3	Neoplasia
74	French Bulldog	FE	4	Chronic	Progressive	over 4	Yes	Yes	Present	No	NA	No	No	No	T3-L3	Extradural	T2-T6	Anomalous
75	Dogue de Bordeaux	ME	36	Acute	Progressive	over 4	Yes	Yes	Present	No	NA	No	Yes	Yes	T3-L3	Extradural	T2-T3	Anomalous
76	Dachshund	MN	96	Acute	Progressive	less 2	Yes	Yes	Present	Yes	Right	No	No	Yes	C1-C5	Extradural	T1-T2	Degenerative
77	Labrador Retriever	FE	6	Chronic	Progressive	over 4	No	No	Present	No	NA	No	No	No	T3-L3	Extradural	T5	Anomalous
78	Cocker Spaniel	MN	98	Acute	Progressive	2 to 4	Yes	Yes	Present	Yes	Left	No	No	No	T3-L3	Intradural-extramedullary	T6-T7	Neoplasia
79	Cocker Spaniel	MN	33	Acute	Progressive	2 to 4	Yes	Yes	Present	Yes	Left	No	No	Yes	T3-L3	Extradural	T3-T4	Degenerative
80	Flat Coated Retriever	MN	72	Acute	Progressive	less 2	No	No	Present	No	NA	No	Yes	Yes	T3-L3	Extradural	T3	Neoplasia
81	Cairn Terrier	ME	139	Acute	Progressive	less 2	No	No	Absent	No	NA	No	Yes	Yes	T3-L3	Intramedullary	T4	Vascular
82	Labrador Retriever	FE	120	Chronic	Progressive	over 4	Yes	Yes	Present	Yes	Right	Yes*	No	Yes	T3-L3	Extradural	T4-T5	Degenerative
83	English Bulldog	ME	4	Acute	Progressive	2 to 4	Yes	Yes	Present	No	NA	No	No	No	T3-L3	Extradural	T5-T6	Degenerative
84	Miniature Schnauzer	FE	78	Acute	Progressive	over 4	No	No	Present	Yes	Left	No	No	Yes	C6-T2	Extradural	T2	Neoplasia
